# Supplementary material
Source: Springer Nature journal article supplement (https://mijn.bsl.nl/resource/supplementary/13047_2008_88_MOESM4_ESM.pdf/7109596)
Supplement: MOESM4 [file 7109596]

---

**Pattern****Image****Location**

---

Parallel furrow

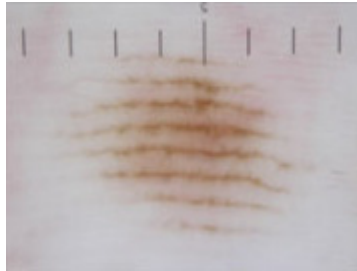

Observed mainly on the margins of the weightbearing surfaces, pigmentation is observed in the furrows

Lattice-like pattern

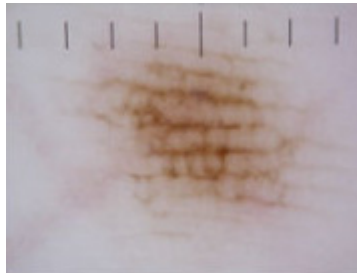

Arch areas and non-weightbearing volar areas, pigmentation is observed in the furrows with links crossing like rungs on a ladder

Fibrillar pattern

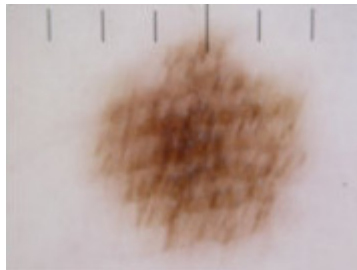

Weight bearing areas (particularly heels, forefoot and pulps of the toe), pigmentation is observed in the furrows with fine parallel streaks crossing the dermatoglyphics tangentially

---
